# Supplementary material for: Association oflincRNA-p21Haplotype with Coronary Artery Disease in a Chinese Han Population
Source: Hindawi journal article supplement (doi:10.1155/2016/9109743), 2016-01-01
Supplement: f1 [file 9109743.f1.pdf]

**TABLE S1:** The information for alleles captured by rs9380586, rs4713998, rs6930083 and rs6931097, accordingly.

| <b>Alleles captured</b> | <b>Location</b> | <b>tagSNP</b> | <b>r<sup>2</sup></b> |
|-------------------------|-----------------|---------------|----------------------|
| rs6930083               | Exon 1          | rs6930083     | 1.0                  |
| rs4711457               | Exon 2          | rs6930083     | 1.0                  |
| rs4713999               | Exon 2          | rs6930083     | 1.0                  |
| rs9394368               | 3' UTR          | rs6930083     | 1.0                  |
| rs4713996               | 3' UTR          | rs6930083     | 1.0                  |
| rs4714001               | 5' UTR          | rs6930083     | 0.938                |
| rs4713997               | 3' UTR          | rs9380586     | 1.0                  |
| rs9380586               | 3' UTR          | rs9380586     | 1.0                  |
| rs9380585               | 3' UTR          | rs9380586     | 1.0                  |
| rs4714000               | 5' UTR          | rs9380586     | 1.0                  |
| rs6931097               | Exon 1          | rs6931097     | 1.0                  |
| rs4713998               | Exon 2          | rs4713998     | 1.0                  |

**TABLE S2.** The sequences of the primers and probes used to genotype the rs9380586, rs4713998, rs6930083 and rs6931097 polymorphisms.

| Name             | Sequence (5'-3')                                                   |
|------------------|--------------------------------------------------------------------|
| <b>Primers</b>   |                                                                    |
| rs9380586-F      | GGAGCCTTTCTATAGTTTTTC                                              |
| rs9380586-R      | AATCAATGAATCCTCCTCTG                                               |
| rs4713998-F      | AGAATAACCCGAGCTGAAGG                                               |
| rs4713998-R      | ATGCATAGACGGTTGTGGTG                                               |
| rs6930083-F      | AAGGATGTGAAGCCATTTGC                                               |
| rs6930083-R      | GTGAGCAGTCAGCCAGTTTG                                               |
| rs6931097-F      | AGAAAATGGGTAGCTGGAGG                                               |
| rs6931097-R      | CATTCACATGGTCCACAGTC                                               |
| <b>Probes</b>    |                                                                    |
| rs9380586_modify | P-CCTTTTTCATGATATTA AAAAATTTTTTTTTTTTTTTTTTTTTTTT-FAM              |
| rs9380586_A      | TTTTTTTTTTTTTTTTTTTTTAATGAATCCTCCTCTGAAACAAT                       |
| rs9380586_G      | TTTTTTTTTTTTTTTTTTTTTAATGAATCCTCCTCTGAAACAAC                       |
| rs4713998_modify | P-AGAGAGAGAATGGGGCCATCTTTTTTTTTTTTTTTTTTTTTTTTTTTT<br>TTTTTTTT-FAM |
| rs4713998_A      | TTTTTTTTTTTTTTTTTTTTTTTTTTTTTTTTTTTTTTGGAGGACACAGGAGA<br>GGCAAGAT  |
| rs4713998_G      | TTTTTTTTTTTTTTTTTTTTTTTTTTTTTTTTTTTTTTGGAGGACACAGGA<br>GAGGCAAGAC  |
| rs6930083_modify | P-GCTAGCTGTGGGCTGTAATGTTTTTTTTTTTTTTTTTTTTTTTTTTTTTT<br>TTTT-FAM   |
| rs6930083_A      | TTTTTTTTTTTTTTTTTTTTTTTTTTTTTTTTTTGGCAAACCAAGACAGTAGG<br>TCCT      |
| rs6930083_G      | TTTTTTTTTTTTTTTTTTTTTTTTTTTTTTTTTTGGCAAACCAAGACAGTA<br>GGTCCC      |
| rs6931097_modify | P-CTCCTACCCCTACCCTCCAGTTTTTTTTTTTTTTTTTTTTTTT-FAM                  |
| rs6931097_A      | TTTTTTTTTTTTTTTTTTAGGCTATTCAGTGAAAACCTCTCT                         |
| rs6931097_G      | TTTTTTTTTTTTTTTTTTAGGCTATTCAGTGAAAACCTCTCC                         |

**TABLE S3.** The characteristics of premature CAD, MI and controls.

| Variable               | Controls<br>(n =309) | CAD<br>(n =238) | MI<br>(n =129) | <i>P</i> <sup>a</sup> vs. controls |                              |
|------------------------|----------------------|-----------------|----------------|------------------------------------|------------------------------|
|                        |                      |                 |                | CAD                                | MI                           |
| Age (years)            | 50.47 ± 6.96         | 51.77 ± 6.40    | 51.40 ± 6.29   | <b>0.025<sup>b</sup></b>           | 0.194                        |
| Sex (male)             | 175 (56.6%)          | 189 (79.4%)     | 109 (85.4%)    | <b>&lt;0.001</b>                   | <b>&lt;0.001<sup>b</sup></b> |
| Smoking                | 83 (26.9%)           | 150 (63.0%)     | 84 (65.1%)     | <b>&lt;0.001</b>                   | <b>&lt;0.001</b>             |
| Drinking               | 50 (16.2%)           | 69 (29.0%)      | 36 (27.9%)     | <b>&lt;0.001</b>                   | <b>0.005</b>                 |
| Hypertension           | 76 (24.6%)           | 148 (62.2%)     | 78 (60.5%)     | <b>&lt;0.001</b>                   | <b>&lt;0.001</b>             |
| Diabetes               | 44 (14.2%)           | 113 (47.5%)     | 62 (48.1%)     | <b>&lt;0.001</b>                   | <b>&lt;0.001</b>             |
| Hyperlipidemia         | 125 (40.5%)          | 176 (73.9%)     | 97 (75.2%)     | <b>&lt;0.001</b>                   | <b>&lt;0.001</b>             |
| Systolic BP (mm Hg)    | 128.50 ± 15.79       | 141.83 ± 18.76  | 140.13 ± 19.91 | <b>&lt;0.001</b>                   | <b>&lt;0.001</b>             |
| Diastolic BP (mm Hg)   | 72.83 ± 10.10        | 76.97 ± 10.42   | 76.21 ± 11.27  | <b>&lt;0.001</b>                   | <b>0.002</b>                 |
| FPG (mM)               | 5.78 ± 2.32          | 6.59 ± 1.60     | 6.61 ± 1.64    | <b>&lt;0.001</b>                   | <b>&lt;0.001</b>             |
| Triglycerides (mM)     | 1.58 ± 0.94          | 2.16 ± 1.08     | 2.17 ± 1.11    | <b>&lt;0.001</b>                   | <b>&lt;0.001</b>             |
| Total cholesterol (mM) | 4.61 ± 1.18          | 4.83 ± 1.25     | 4.88 ± 1.19    | <b>0.041</b>                       | <b>0.036</b>                 |
| HDL cholesterol (mM)   | 1.44 ± 0.89          | 1.19 ± 0.38     | 1.15 ± 0.38    | <b>&lt;0.001</b>                   | <b>&lt;0.001</b>             |
| LDL cholesterol (mM)   | 2.61 ± 0.99          | 3.08 ± 0.93     | 3.12 ± 0.98    | <b>&lt;0.001</b>                   | <b>&lt;0.001</b>             |

<sup>a</sup> Two-sided chi-square test or independent-samples *t*-test.

<sup>b</sup> *P* values under 0.05 were shown in bold font.

**TABLE S4.** Multivariate associations of the SNPs in *lincRNA-p21* gene with the risk of premature CAD/MI.

| Type                    | Controls         | premature Cases  |                 | OR (95% CI) <sup>a</sup> vs. controls |                  | P <sup>a</sup> vs. controls |       |
|-------------------------|------------------|------------------|-----------------|---------------------------------------|------------------|-----------------------------|-------|
|                         | No. (%)<br>n=309 | CAD (%)<br>n=238 | MI (%)<br>n=129 | CAD                                   | MI               | CAD                         | MI    |
| <b><u>rs9380586</u></b> |                  |                  |                 |                                       |                  |                             |       |
| G                       | 555 (89.8)       | 418 (87.8)       | 227 (88.0)      | 1                                     | 1                |                             |       |
| A                       | 63 (10.2)        | 58 (12.2)        | 31 (12.0)       | 1.40 (0.86-2.28)                      | 1.42 (0.79-2.57) | 0.172                       | 0.244 |
| GG                      | 251 (81.2)       | 184 (77.3)       | 100 (77.6)      | 1                                     | 1                |                             |       |
| AA+AG                   | 58 (18.8)        | 54 (22.7)        | 29 (22.4)       | 1.38 (0.81-2.36)                      | 1.33 (0.69-2.54) | 0.235                       | 0.393 |
| <b><u>rs4713998</u></b> |                  |                  |                 |                                       |                  |                             |       |
| A                       | 486 (78.6)       | 385 (80.9)       | 205 (79.5)      | 1                                     | 1                |                             |       |
| G                       | 132 (21.4)       | 91 (19.1)        | 53 (20.5)       | 0.77 (0.52-1.14)                      | 0.89 (0.55-1.44) | 0.187                       | 0.634 |
| AA                      | 191 (61.8)       | 155 (65.1)       | 79 (61.2)       | 1                                     | 1                |                             |       |
| AG+GG                   | 118 (38.2)       | 83 (34.9)        | 50 (38.8)       | 0.70 (0.45-1.10)                      | 0.88 (0.51-1.51) | 0.125                       | 0.646 |
| <b><u>rs6930083</u></b> |                  |                  |                 |                                       |                  |                             |       |
| G                       | 436 (70.6)       | 351 (73.7)       | 205 (79.5)      | 1                                     | 1                |                             |       |
| A                       | 182 (29.4)       | 125 (26.3)       | 53 (20.5)       | 0.94 (0.66-1.35)                      | 1.00 (0.64-1.56) | 0.743                       | 0.997 |
| GG                      | 149 (48.2)       | 127 (53.4)       | 79 (61.2)       | 1                                     | 1                |                             |       |
| AG+AA                   | 160 (51.8)       | 111 (46.6)       | 50 (38.8)       | 0.90 (0.59-1.39)                      | 1.02 (0.60-1.73) | 0.646                       | 0.942 |
| <b><u>rs6931097</u></b> |                  |                  |                 |                                       |                  |                             |       |
| G                       | 375 (60.7)       | 291 (61.1)       | 162 (62.8)      | 1                                     | 1                |                             |       |
| A                       | 243 (39.3)       | 185 (38.9)       | 96 (37.2)       | 0.89 (0.67-1.25)                      | 0.86 (0.58-1.27) | 0.583                       | 0.434 |
| GG                      | 115 (37.2)       | 86 (36.1)        | 48 (37.2)       | 1                                     | 1                |                             |       |
| AA+AG                   | 194 (62.8)       | 152 (63.9)       | 81 (62.8)       | 0.92 (0.59-1.43)                      | 0.87 (0.51-1.50) | 0.708                       | 0.618 |

<sup>a</sup> Adjusted for sex, smoking, drinking, hypertension, diabetes, hyperlipidemia.
